# Supplementary material for: Requirement on the Capacity of Energy Storage to Meet the 2 °C Goal
Source: MDPI journal article supplement (doi:10.3390/su16093753), 2024-04-30
Supplement: s1 [file s1]

Archive with 1 entries (1 files):
- sustainability-2948879-supplementary.pdf
